# Supplementary material for: VCAN Canonical Splice Site Mutation is Associated With Vitreoretinal Degeneration and Disrupts an MMP Proteolytic Site
Source: PubMed Central journal article supplement — Invest Ophthalmol Vis Sci. 2019 Jan;60(1):282–93. doi: 10.1167/iovs.18-25624 (PMC6735613; doi:10.1167/iovs.18-25624), 2019-01
Supplement: iovs-60-01-09_s01.pdf [file iovs-60-01-09_s01.pdf]

## Supplementary Online Content

### **VCAN canonical splice site mutation is associated with vitreoretinal degeneration and disrupts an MMP proteolytic site**

Tang PH\*, Velez G\*, Tsang SH, Bassuk AG, Mahajan VB

*\*co-first authors*

#### **Table of Contents**

**Supplemental Table 1.** Putative MMP-2 cleavage sites in the versican GAG $\beta$  chain.

**Supplemental Table 2.** FRET peptides used in MMP experiments.

**Supplemental Figure 1.** MMP FRET assay design.

**Supplemental Table 1.** Putative MMP-2 cleavage sites in the versican GAG $\beta$  chain.

| <b>P1 Position</b> | <b>Residues</b>    | <b>PWM Score</b> | <b>N-Mass (Da)</b> | <b>C-Mass (Da)</b> |
|--------------------|--------------------|------------------|--------------------|--------------------|
| <b>1339</b>        | <b>GRMSD-LSVIG</b> | <b>2.38</b>      | <b>146729.77</b>   | <b>225875.2</b>    |
| 1541               | TEPVS-LFPEE        | 1.19             | 169022.91          | 203582.06          |
| 1629               | RQVVE-LSGSS        | 3.16             | 178606.55          | 193998.42          |
| 2096               | IEPAK-LWSRQ        | 7.1              | 228603.42          | 144001.55          |
| 2179               | TSLVN-MSTPD        | 3.77             | 238251.88          | 134353.09          |
| 2239               | HFPKG-MRPTI        | 5.46             | 244759.04          | 127845.93          |
| 2423               | PKPSD-LYYEP        | 4.53             | 264739.52          | 107865.45          |
| 2531               | FEDST-LKPNR        | 0.31             | 276427.9           | 96177.07           |
| 2715               | AEAKA-LDDMF        | 1.43             | 296779.79          | 75825.18           |
| 2819               | STFAK-LSSQT        | 3.88             | 308190.04          | 64414.93           |
| 2848               | PQPSA-LPGID        | 4.45             | 311100.39          | 61504.58           |
| 2891               | TEPPS-LSPDT        | 1.96             | 315793.62          | 56811.35           |
| 3017               | ETQAA-LIRGQ        | 3.01             | 329194.02          | 43410.95           |

**Supplemental Table 2.** FRET Peptides used in MMP-2 experiments.

| Peptide                    | Description      | Sequence         | FRET Pairs | Ex/Em (nm) | Catalog Number |
|----------------------------|------------------|------------------|------------|------------|----------------|
| 520 MMP FRET Substrate III | Positive Control | PLGC(Me)HAR(D-)K | QXL/5-FAM  | 490/520    | AS-60570       |
| Scrambled 520 MMP FRET III | Negative Control | HGLC(Me)ARPK     | QXL/5-FAM  | 490/520    | AS-69139-1     |
| VCAN p.1335-1347           | Experimental     | GRMSDLISMIGHPIK  | QXL/5-FAM  | 490/520    | AS-69139-2     |
| Scrambled VCAN p.1335-1347 | Negative Control | IMDGGHLIPMSRSK   | QXL/5-FAM  | 490/520    | AS-69663       |
